# Supplementary material for: Long non-coding RNA TPT1-AS1 promotes angiogenesis and metastasis of colorectal cancer through TPT1-AS1/NF90/VEGFA signaling pathway
Source: publisher site journal article supplement (doi:10.18632/aging.103016), 2020-04-04
Supplement: Supplementary file [file aging-v12i7-103016-supplementary-material-SD1.pdf]

## SUPPLEMENTARY FIGURE

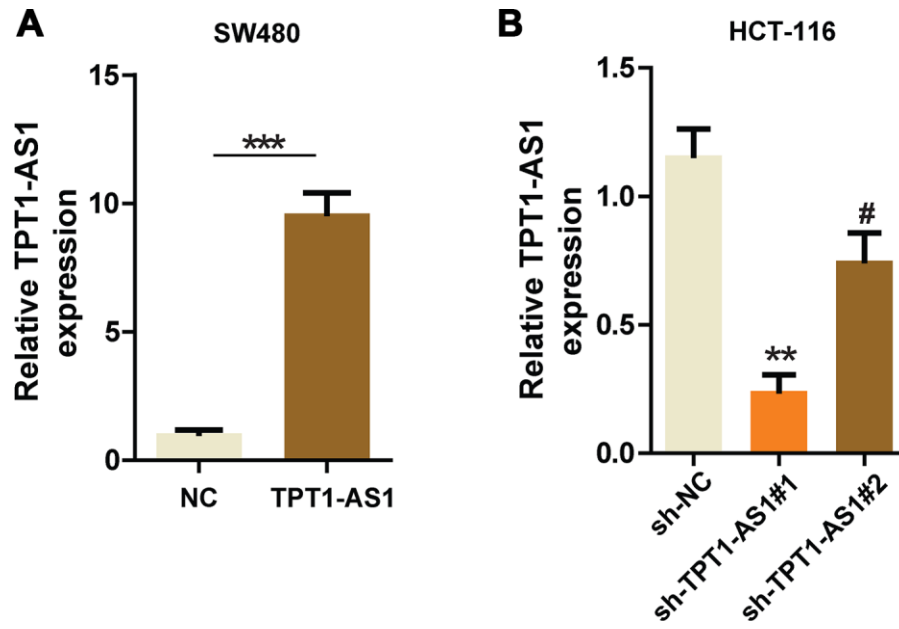

**Supplementary Figure 1.** The expression of TPT1-AS1 was detected in TPT1-AS1-overexpressed SW480 cells (A) or TPT1-AS1-knockdown HCT116 cells (B).
